# Supplementary material for: Synergistic Amelioration of Imidacloprid-Induced Infertility by Vitex agnus-castus and Nigella sativa in Female Rats: Mechanistic Evidence of Hormonal and Reproductive Restoration
Source: Research Square preprint supplement (doi:10.21203/rs.3.rs-8218984/v1), 2025-12-03
Supplement: Supplementary file 1 [file dbba56bd501795751f083b7b.pdf]

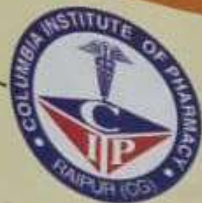

# COLUMBIA INSTITUTE OF PHARMACY

Email : cipraipur@gmail.com, Visit us at : www.columbiaiop.ac.in

NBA Accredited UG Programme (B. Pharm)

CPCSEA (New Delhi) approved lab for breeding & experimentation of small animals  
DST-FIST, GOI New Delhi, Supported PG Programme (M. Pharm)

## CERTIFICATE

- This is to certify that the project proposal no. CIP/IAEC/2025/246 entitled **Assessment of Therapeutic potential of Vitex Agnus-Castus and Nigella Sativa L. (Black Cumin) seed extract on Imidacloprid (pesticide) induced infertility and hormonal imbalance in female rats** submitted by **Ms. Darshana Rath** has been approved/recommended by the IAEC of CIP, Raipur in its meeting held on 17/02/2025 and Wistar albino rats (48) have been sanctioned under this proposal for duration of next 3 months.

| Authorized by | Name | Signature | Date |
|---------------|------|-----------|------|
|---------------|------|-----------|------|

|                     |                     |                                                                                     |  |
|---------------------|---------------------|-------------------------------------------------------------------------------------|--|
|                     |                     |  |  |
| Chairman/Principal: | Dr. Ravindra Pandey |                                                                                     |  |

|                       |               |                                                                                     |  |
|-----------------------|---------------|-------------------------------------------------------------------------------------|--|
|                       |               |  |  |
| Main Nominee (CCSEA): | Dr. Ajazuddin |                                                                                     |  |

RUN BY : JAN PRAGATI EDUCATION SOCIETY

City office :  
1st Floor, Laxmi Plaza, Near Bijli Chowk, Budhapara, Raipur (C.G.) - 492001  
Ph. : 0771-4004682, Telefax : 0771-4004681

Campus :  
Village-Tekari, Post Girod, Near Vidhan Sabha, Raipur (C.G.) -  
Ph. : +91 8109777888 / 8109888999, Telefax : 0771 - 4004681

Approved by AICTE & PCI, New Delhi, Affiliated to Chhattisgarh Swami Vivekanand Technical University (CSVTU), Bhilai (C.G.)
